# Supplementary material
Source: ML conference proceedings conference paper supplement (https://openaccess.thecvf.com/content/CVPR2024/html/Zanella_On_the_Test-Time_CVPR_2024_paper.html)
Supplement: Supplementary file [file Zanella_On_the_Test-Time_CVPR_2024_supplemental.pdf]

## A. Proof of Equation 6

Here, we give details of the derivation of the  $\mathbf{y}$ -updates in Eq. (6) from the upper bound (majorizing function) in (9). Given a solution  $\mathbf{y}^{(n)}$  at iteration  $n$ , the goal is to find the next iterate  $\mathbf{y}^{(n+1)}$  that minimizes the following tight upper bound, s.t. simplex constraint  $\mathbf{y} \in \Delta^{N-1}$ :

$$\mathcal{B}(\mathbf{y}, \mathbf{y}^{(n)}) = -\mathbf{y}^t \mathbf{k} - \frac{\lambda}{2} \mathbf{y}^t W^t \mathbf{y}^{(n)} - \lambda_{\mathbf{y}} H(\mathbf{y}) \quad (9)$$

where  $\mathbf{k} = (K(\mathbf{f}_p - \mathbf{m}))_{1 \leq p \leq N}$ .

The objective function of (9) is strictly convex. Taking into account the simplex constraint on  $\mathbf{y}$ , the associated Lagrangian reads:

$$\mathcal{L}(\mathbf{y}, \mathbf{y}^{(n)}) = -\mathbf{y}^t \mathbf{k} - \frac{\lambda}{2} \mathbf{y}^t W^t \mathbf{y}^{(n)} - \lambda_{\mathbf{y}} H(\mathbf{y}) + \gamma (\mathbf{y}^t \mathbf{1}_N - 1) \quad (10)$$

where  $\gamma$  is the Lagrange multiplier for simplex constraint  $\mathbf{y} \in \Delta^{N-1}$  and  $\mathbf{1}_N$  is the vector of ones. Note that we do not impose explicitly the constraints on the non-negativity of the components of  $\mathbf{y}$  because these are implicitly enforced with the entropic barrier term in (9), i.e.,  $-\lambda_{\mathbf{y}} H(\mathbf{y})$ . Now, computing the gradient of  $\mathcal{L}(\mathbf{y}, \mathbf{y}^{(n)})$  w.r.t  $\mathbf{y}$  yields:

$$\nabla_{\mathbf{y}} \mathcal{L}(\mathbf{y}, \mathbf{y}^{(n)}) = -\mathbf{k} - \lambda W^t \mathbf{y}^{(n)} + (\gamma + \lambda_{\mathbf{y}}) \mathbf{1}_N + \lambda_{\mathbf{y}} \log(\mathbf{y}) \quad (11)$$

By setting the gradients of (11) to 0, we get the optimal solution:

$$y_p^{(n+1)} = \exp \left( \frac{(K(\mathbf{f}_p - \mathbf{m}) + \lambda \sum_{q=1}^N w_{p,q} y_q^{(n)}) / \lambda_{\mathbf{y}}}{\exp(-(\gamma + \lambda_{\mathbf{y}}))} \right) \quad (12)$$

Using this expression in the simplex constraint  $\sum_p y_p^{(n+1)} = 1$  enables to recover the following expression of  $\exp(\gamma + \lambda_{\mathbf{y}})$ :

$$\sum_{j=1}^N \exp \left( \frac{(K(\mathbf{f}_j - \mathbf{m}) + \lambda \sum_{q=1}^N w_{j,q} y_q^{(n)}) / \lambda_{\mathbf{y}}}{\exp(-(\gamma + \lambda_{\mathbf{y}}))} \right) = 1$$

Plugging this expression back in (12), we get the final updates:

$$y_p^{(n+1)} = \frac{\exp \left( \frac{(K(\mathbf{f}_p - \mathbf{m}) + \lambda \sum_{q=1}^N w_{p,q} y_q^{(n)}) / \lambda_{\mathbf{y}}}{\exp(-(\gamma + \lambda_{\mathbf{y}}))} \right)}{\sum_{j=1}^N \exp \left( \frac{(K(\mathbf{f}_j - \mathbf{m}) + \lambda \sum_{q=1}^N w_{j,q} y_q^{(n)}) / \lambda_{\mathbf{y}}}{\exp(-(\gamma + \lambda_{\mathbf{y}}))} \right)} \quad (13)$$

## B. Cauchy and convergent sequence proof

Let us consider iteration  $l$ , with the associated current *lierness* scores  $\mathbf{y}$ . Let us prove that  $\{\mathbf{m}^l\}_{l \in \mathbb{N}}$  is a Cauchy sequence. Recall the recursive relation:

$$\mathbf{m}^{l+1} = \frac{\sum_{p=1}^N y_p K(\mathbf{f}_p - \mathbf{m}^l) \mathbf{f}_p}{\sum_{p=1}^N y_p K(\mathbf{f}_p - \mathbf{m}^l)} \quad (14)$$

with  $K(\mathbf{f}_p - \mathbf{m}^l) = \exp(-\|\frac{\mathbf{f}_p - \mathbf{m}^l}{h}\|^2)$ , for some  $h > 0$ . We define:

$$k(x) = \exp(-x) \quad (15)$$

$$u^l = \sum_{p=1}^N y_p K(\mathbf{f}_p - \mathbf{m}^l) \quad (16)$$

$$v^l = \sum_{p=1}^N y_p K(\mathbf{f}_p - \mathbf{m}^l) \mathbf{f}_p \quad (17)$$

**Step 1:** First, let us prove that  $\{u^l\}_{l \in \mathbb{N}}$  is a Cauchy sequence. Recall that in a metric space, a convergent sequence is necessarily a Cauchy sequence. Therefore, we only need to show that  $u^l$  is convergent (i.e bounded and strictly monotonic).

Notice that for  $x > 0$ ,  $0 \leq k(x) \leq 1$ . Therefore:

$$u^l = \sum_{p=1}^N y_p k\left(\left\|\frac{\mathbf{f}_p - \mathbf{m}^l}{h}\right\|^2\right) \quad (18)$$

$$\leq \sum_{p=1}^N y_p \leq 1 \quad (19)$$

Therefore,  $u^l$  is bounded between 0 and 1. Now, let us study the consecutive differences  $\Delta^l = u^{l+1} - u^l$ :

$$\Delta^l = \sum_{p=1}^N y_p \left[ k\left(\frac{\|\mathbf{f}_p - \mathbf{m}^{l+1}\|^2}{h^2}\right) - k\left(\frac{\|\mathbf{f}_p - \mathbf{m}^l\|^2}{h^2}\right) \right] \quad (20)$$

Because  $k$  is convex, one can say that  $\forall a, b \in \mathbb{R}$ :

$$k(a) - k(b) \geq k'(b)(a - b) \quad (21)$$

And because  $k'(b) = -k(b)$  in our case, one ends up with:

$$k(a) - k(b) \geq k(b)(b - a) \quad (22)$$

Applied with  $a = \frac{\|\mathbf{f}_p - \mathbf{m}^{l+1}\|^2}{h^2}$  and  $b = \frac{\|\mathbf{f}_p - \mathbf{m}^l\|^2}{h^2}$ , one can obtain:

$$\begin{aligned} \Delta^l &\geq \sum_{p=1}^N y_p K(\mathbf{f}_p - \mathbf{m}^l) \left[ \frac{\|\mathbf{f}_p - \mathbf{m}^l\|^2}{h^2} - \frac{\|\mathbf{f}_p - \mathbf{m}^{l+1}\|^2}{h^2} \right] \\ &= \frac{1}{h^2} \sum_{p=1}^N y_p K(\mathbf{f}_p - \mathbf{m}^l) [\|\mathbf{m}^l\|^2 - \|\mathbf{m}^{l+1}\|^2 \\ &\quad - 2 \langle \mathbf{m}^l, \mathbf{f}_p \rangle + 2 \langle \mathbf{m}^{l+1}, \mathbf{f}_p \rangle] \end{aligned}$$

Now is time to recall recursive relation  $\mathbf{m}^{l+1} = \frac{v^l}{u^l}$ . By simply expanding, one can end up with:

$$\begin{aligned} \Delta^l &\geq \frac{1}{h^2} \left[ \|\mathbf{m}^l\|^2 u^l - \frac{\|v^l\|^2}{u^l} - 2 \langle \mathbf{m}^l, v^l \rangle + 2 \frac{\|v^l\|^2}{u^l} \right] \\ &= \frac{1}{h^2} u^l \left[ \|\mathbf{m}^l\|^2 - 2 \langle \mathbf{m}^l, \mathbf{m}^{l+1} \rangle + \|\mathbf{m}^{l+1}\|^2 \right] \\ &= \frac{1}{h^2} u^l \|\mathbf{m}^l - \mathbf{m}^{l+1}\|^2 \end{aligned} \quad (23)$$

Therefore,  $\Delta^l > 0$ , which shows that  $\{u^l\}_{l \in \mathbb{N}}$  is strictly increasing. This concludes the proof that  $u^l$  is a convergent sequence, and therefore a Cauchy one.

**Step 2:** Now, on top of concluding the proof that  $\{u^l\}_{l \in \mathbb{N}}$  is a Cauchy sequence, Eq. (23) also offers an interesting relation between  $\{\Delta^l\}_{l \in \mathbb{N}}$  and the sequence of interest  $\{\mathbf{m}^l\}_{l \in \mathbb{N}}$ , which we can use. Indeed, for any  $l_0, m \in \mathbb{N}$ , we can sum Eq. (23):

$$\sum_{l=l_0}^{l_0+m} \Delta^l \geq \frac{1}{h^2} \sum_{l=l_0}^{l_0+m} u^l \|\mathbf{m}^l - \mathbf{m}^{l+1}\|^2 \quad (24)$$

$$\geq \frac{u^{l_0}}{h^2} \sum_{l=l_0}^{l_0+m} \|\mathbf{m}^l - \mathbf{m}^{l+1}\|^2 \quad (25)$$

$$\geq \frac{u^{l_0}}{h^2} \|\mathbf{m}^{l_0+m} - \mathbf{m}^{l_0}\|^2 \quad (26)$$

Where Eq. (25) follows because  $\{u^l\}_{l \in \mathbb{N}}$  is strictly increasing, and Eq. (26) follows from the triangle inequality. Now, the left-hand side of Eq. (24) can be reduced to  $\sum_{l=l_0}^{l_0+m} \Delta^l = u^{l_0+m+1} - u^{l_0}$ . But because we proved in Step 1 that  $\{u^l\}_{l \in \mathbb{N}}$  was a Cauchy sequence, this difference is bounded by a constant. This concludes the proof that  $\{\mathbf{m}^l\}_{l \in \mathbb{N}}$  is itself a Cauchy sequence in the Euclidean space.

**Step 3:** We just proved that  $\{\mathbf{m}^l\}_{l \in \mathbb{N}}$  was a Cauchy sequence. Therefore  $\{\mathbf{m}^l\}_{l \in \mathbb{N}}$  can only converge to a single value  $\mathbf{m}^*$ . We now use the continuity of function  $g$  to conclude that  $\mathbf{m}^*$  has to be a solution of the initial equation (7):

$$\mathbf{m}^* = \lim_{l \rightarrow \infty} \mathbf{m}^{l+1} = \lim_{l \rightarrow \infty} g(\mathbf{m}^l) \quad (27)$$

$$= g(\lim_{l \rightarrow \infty} \mathbf{m}^l) = g(\mathbf{m}^*) \quad (28)$$

## C. Further details on MTA

We summarize the traditional mode seeking MeanShift procedure, upon which our approach is based, in Algorithm 1. Moreover, our robust multi-modal MeanShift for test-time augmentation, named MTA, is presented in Algorithm 2 in a non-vectorized manner to highlight each operation. The handcrafted prompts [46] for ensembling are listed in Table 12. We use  $N=64$  augmented views (63 from random

Table 7. Effect of  $\lambda$  and  $\lambda_y$  on the ImageNet dataset. Reported value is the top-1 accuracy averaged over 3 random seeds.

| $\lambda \backslash \lambda_y$ | 0.01 | 0.05 | 0.1  | 0.2  | 0.4  | 0.8  | 1.6  | 3.2  | 10   | 100  | $\rightarrow \infty$<br>(MeanShift) |
|--------------------------------|------|------|------|------|------|------|------|------|------|------|-------------------------------------|
| 0                              | 66.7 | 66.7 | 66.8 | 68.3 | 65.8 | 65.3 | 65.6 | 65.9 | 66.0 | 66.1 | 66.1                                |
| 0.5                            | 66.7 | 66.7 | 66.8 | 68.7 | 67.7 | 66.8 | 66.4 | 66.2 | 66.1 | 66.1 | -                                   |
| 1                              | 66.7 | 66.7 | 66.9 | 68.9 | 68.2 | 67.4 | 66.9 | 66.5 | 66.3 | 66.1 | -                                   |
| 2                              | 66.8 | 66.8 | 67.1 | 69.1 | 68.8 | 68.0 | 67.4 | 67.0 | 66.5 | 66.1 | -                                   |
| 4                              | 66.6 | 66.5 | 66.9 | 69.3 | 69.1 | 68.6 | 68.0 | 67.5 | 66.8 | 66.2 | -                                   |
| 8                              | 62.0 | 62.5 | 64.2 | 68.7 | 69.3 | 69.0 | 68.5 | 68.1 | 67.2 | 66.3 | -                                   |
| 16                             | 57.3 | 58.5 | 61.0 | 65.8 | 69.1 | 69.3 | 68.9 | 68.5 | 67.7 | 66.4 | -                                   |

cropping (RandomCrop) and the original image) in all our experiments except in Table 3 to be consistent with DiffTPT which uses 128 augmented views (63 from diffusion, 64 from random cropping and the original image). Table 7 shows the interdependency of  $\lambda$  and  $\lambda_y$  and the role of the *inlierness* scores: as  $\lambda_y$  approaches 0, it tends toward a peak selection and trivial solutions; conversely, as  $\lambda_y$  grows, it tends to MeanShift with uniform *inlierness* scores.

---

### Algorithm 1 Mode seeking MeanShift [9]

---

**Require:**  $h > 0$  the bandwidth,  $K$  a kernel function (e.g., Gaussian kernel),  $\mathbf{m}^0$  a first estimate of the mode, a set of data points  $(\mathbf{f}_p)_{1 \leq p \leq N}$ , a threshold value  $\epsilon$

- 1:  $l \leftarrow 0$
  - 2: **while**  $l = 0$  or  $\|\mathbf{m}^l - \mathbf{m}^{l-1}\| \geq \epsilon$  **do**
  - 3:      $\mathbf{m}^{l+1} \leftarrow \frac{\sum_{p=1}^N K(\mathbf{f}_p - \mathbf{m}^l) \mathbf{f}_p}{\sum_{p=1}^N K(\mathbf{f}_p - \mathbf{m}^l)}$      ▷ mode update
  - 4:      $l \leftarrow l + 1$
  - 5: **end while**
  - 6:  $\mathbf{m} \leftarrow \mathbf{m}^{l-1}$
  - 7: **return**  $\mathbf{m}$
- 

## D. Additional results

**Zero-shot (Section 5).** We report detailed results for Table 1, Table 2 and Table 3 with average top-1 accuracy and standard deviation in Table 8, Table 9 and Table 10 respectively.

**Few-shot (Section 6).** Additional results for CoOp with 16 tokens are depicted in Figure 5. A similar trend to that shown in Figure 3 is evident, with more pronounced performance degradation observed for TPT. On the contrary, MTA benefits from these more performant prompts.

**Ablation study (Section 7).** Details for the 15 datasets for the filtering strategy ablation study of Table 6 are given in Table 11. With the exception of ImageNet-A, the confidence threshold strategy consistently demonstrates lower performances compared to our *inlierness* formulation.

---

**Algorithm 2** MTA with Gaussian kernel

---

**Require:** A set of augmented embeddings  $(\mathbf{f}_p)_{1 \leq p \leq N}$  with  $\mathbf{f}_1$  being the original image, a set of class embeddings  $(\mathbf{t}_k)_{1 \leq k \leq K}$ , a threshold value  $\epsilon$ ,  $\tau$  the temperature variable of the CLIP model.

```
1:  $w_{p,q} \leftarrow \text{Affinity}(\mathbf{f}_p, \mathbf{f}_q, (\mathbf{t}_k)_{1 \leq k \leq K}, \tau) \quad \forall p, q \in \{1, \dots, N\}$  ▷ See Algorithm 3
2:  $h_p^2 \leftarrow \frac{1}{\rho(N-1)} \sum_{q \in I_p} \|f_p - f_q\|^2 \quad \forall p \in \{1, \dots, N\}$  ▷  $I_p$  the closest neighbors of  $p$ ,  $\rho$  set to 0.3
3:  $\mathbf{m} \leftarrow \mathbf{f}_1$  ▷ mode initialization
4:  $y_p \leftarrow \frac{1}{N} \quad \forall p \in \{1, \dots, N\}$  ▷ Initial inlierness scores uniform
5: while (1) and (2) not converged do
6:    $n \leftarrow 0$ 
7:    $\mathbf{y}^0 \leftarrow \mathbf{y}$ 
8:   while  $n = 0$  or  $\|\mathbf{y}^n - \mathbf{y}^{n-1}\| \geq \epsilon$  do
9:      $y_p^{(n+1)} \leftarrow \frac{\exp((K(\mathbf{f}_p - \mathbf{m}) + \lambda \sum_{q=1}^N w_{p,q} y_q^{(n)}) / \lambda_{\mathbf{y}})}{\sum_{j=1}^N \exp((K(\mathbf{f}_j - \mathbf{m}) + \lambda \sum_{q=1}^N w_{j,q} y_q^{(n)}) / \lambda_{\mathbf{y}})} \quad \forall p \in \{1, \dots, N\}$  ▷ (1) inlierness scores update
10:     $n \leftarrow n + 1$ 
11:   end while
12:    $\mathbf{y} \leftarrow \mathbf{y}^{n-1}$ 
13:    $l \leftarrow 0$ 
14:    $\mathbf{m}^0 \leftarrow \mathbf{m}$ 
15:   while  $l = 0$  or  $\|\mathbf{m}^l - \mathbf{m}^{l-1}\| \geq \epsilon$  do
16:      $\mathbf{m}^{l+1} \leftarrow \frac{\sum_{p=1}^N y_p K(\mathbf{f}_p - \mathbf{m}^l) \mathbf{f}_p}{\sum_{p=1}^N y_p K(\mathbf{f}_p - \mathbf{m}^l)}$  ▷ (2) mode update
17:      $l \leftarrow l + 1$ 
18:   end while
19:    $\mathbf{m} \leftarrow \mathbf{m}^{l-1}$ 
20: end while
21: return  $\arg \max_k \mathbf{m}^t \mathbf{t}_k$  ▷ return prediction based on the mode
```

---

---

**Algorithm 3** Affinity measure based on predictions

---

```
1: function AFFINITY( $\mathbf{f}_p, \mathbf{f}_q, (\mathbf{t}_k)_{1 \leq k \leq K}, \tau$ )
2:   if  $p = q$  then
3:     return 0
4:   end if
5:    $l_{p,k} \leftarrow \tau \mathbf{f}_p^t \mathbf{t}_k$ ;  $l_{q,k} \leftarrow \tau \mathbf{f}_q^t \mathbf{t}_k \quad \forall k \in \{1, \dots, K\}$  ▷ similarity with class  $k$ 
6:    $s_{p,k} \leftarrow \frac{\exp l_{p,k}}{\sum_{j=1}^K \exp l_{p,j}}$ ;  $s_{q,k} \leftarrow \frac{\exp l_{q,k}}{\sum_{j=1}^K \exp l_{q,j}} \quad \forall k \in \{1, \dots, K\}$  ▷ Softmax operation
7:    $w_{p,q} \leftarrow s_p^t s_q$ 
8:   return  $w_{p,q}$ 
9: end function
```

---

Table 8. Details of Table 1 with averaged top-1 accuracy and standard deviation computed over 3 random seeds.

| Method         |   | ImageNet       | -A             | -V2            | -R             | -Sketch        | Average        |
|----------------|---|----------------|----------------|----------------|----------------|----------------|----------------|
| TPT            | ✗ | 68.94<br>± .06 | 54.63<br>± .21 | 63.41<br>± .12 | 77.04<br>± .02 | 47.97<br>± .05 | 62.40<br>± .03 |
| MTA            | ✓ | 69.29<br>± .09 | 57.41<br>± .15 | 63.61<br>± .07 | 76.92<br>± .13 | 48.58<br>± .05 | 63.16<br>± .07 |
| MTA + Ensemble | ✓ | 70.08<br>± .03 | 58.06<br>± .07 | 64.24<br>± .09 | 78.33<br>± .11 | 49.61<br>± .06 | 64.06<br>± .06 |
| TPT + CoOp     | ✗ | 73.61<br>± .17 | 57.85<br>± .34 | 66.69<br>± .25 | 77.99<br>± .69 | 49.59<br>± .34 | 65.14<br>± .1  |
| MTA + CoOp     | ✓ | 73.99<br>± .18 | 59.29<br>± .12 | 66.97<br>± .25 | 78.2<br>± .76  | 49.96<br>± .46 | 65.68<br>± .25 |

Table 9. Details of Table 2 with averaged top-1 accuracy and standard deviation computed over 3 random seeds.

| Method   | SUN397         | Aircraft       | EuroSAT        | Cars           | Food101        | Pets           | Flower102      | Caltech101     | DTD            | UCF101         | Average        |
|----------|----------------|----------------|----------------|----------------|----------------|----------------|----------------|----------------|----------------|----------------|----------------|
| TPT      | 65.41<br>± .03 | 23.1<br>± .39  | 42.93<br>± .2  | 66.36<br>± .31 | 84.63<br>± .03 | 87.22<br>± .19 | 68.86<br>± .32 | 94.12<br>± .21 | 46.99<br>± .31 | 68.00<br>± .22 | 64.76<br>± .05 |
| MTA      | 64.98<br>± 0   | 25.32<br>± .25 | 38.71<br>± .22 | 68.05<br>± .16 | 84.95<br>± .06 | 88.22<br>± .07 | 68.26<br>± .08 | 94.13<br>± .02 | 45.59<br>± .18 | 68.11<br>± .11 | 64.63<br>± .02 |
| MTA + E. | 66.67<br>± .05 | 25.2<br>± .37  | 45.36<br>± .16 | 68.47<br>± .08 | 85.00<br>± .03 | 88.24<br>± .07 | 68.06<br>± .2  | 94.21<br>± .21 | 45.9<br>± .09  | 68.69<br>± .15 | 65.58<br>± .05 |

Table 10. Details of Table 3 with averaged top-1 accuracy and standard deviation computed over 3 random seeds.

| Augmentation | Method  | ImageNet       | -A             | -V2            | R              | -Sketch       | Average        |
|--------------|---------|----------------|----------------|----------------|----------------|---------------|----------------|
| RandomCrop   | TPT     | 68.15<br>± .3  | 51.23<br>± .31 | 66.17<br>± .2  | 76.88<br>± .2  | 49.31<br>± .2 | 62.35<br>± .05 |
|              | MTA     | 69.11<br>± .4  | 55.27<br>± .15 | 65.71<br>± .4  | 77.48<br>± .36 | 50.23<br>± .4 | 63.56<br>± .11 |
| Diffusion    | DiffTPT | 67.83<br>± .23 | 53.43<br>± .64 | 65.18<br>± .43 | 76.85<br>± .11 | 50.2<br>± .36 | 62.7<br>± .19  |
|              | MTA     | 69.18<br>± .4  | 54.5<br>± .31  | 64.81<br>± .1  | 76.82<br>± .26 | 51.09<br>± .4 | 63.28<br>± .07 |

Table 11. Details of Table 6 for *inlierness* scores ablation study. (1) MeanShift (no *inlierness* scores) (2) confidence thresh. (10%) (3) *Inlierness* scores. I stands for ImageNet, A for ImageNet-A, V for ImageNet-V2, R for ImageNet-R and K for ImageNet-Sketch. Reported values are averaged top-1 accuracy and standard deviation computed over 3 random seeds.

|     | I              | A              | V              | R              | K              | SUN397         | Aircraft       | EuroSAT        | Cars           | Food101        | Pets           | Flower102      | Caltech101     | DTD            | UCF101         | Average        |
|-----|----------------|----------------|----------------|----------------|----------------|----------------|----------------|----------------|----------------|----------------|----------------|----------------|----------------|----------------|----------------|----------------|
| (1) | 66.1<br>± .03  | 48.05<br>± .14 | 60.29<br>± .23 | 67.69<br>± .1  | 40.59<br>± .05 | 63.74<br>± .09 | 25.11<br>± .1  | 24.72<br>± .08 | 66.53<br>± .2  | 83.12<br>± .09 | 85.24<br>± .22 | 66.69<br>± .25 | 91.52<br>± .11 | 44.35<br>± .24 | 65.16<br>± .05 | 59.93<br>± .07 |
| (2) | 68.26<br>± .07 | 60.66<br>± .19 | 63.3<br>± .13  | 76.14<br>± .08 | 47.59<br>± .05 | 63.56<br>± .11 | 24.52<br>± .24 | 36.13<br>± .04 | 67.59<br>± .09 | 83.39<br>± .14 | 85.83<br>± .32 | 66.51<br>± .42 | 92.69<br>± .1  | 45.45<br>± .1  | 67.41<br>± .39 | 63.27<br>± .04 |
| (3) | 69.29<br>± .09 | 57.41<br>± .15 | 63.61<br>± .07 | 76.92<br>± .13 | 48.58<br>± .05 | 64.98<br>± 0   | 25.32<br>± .25 | 38.71<br>± .22 | 68.05<br>± .16 | 84.95<br>± .06 | 88.22<br>± .07 | 68.26<br>± .08 | 94.13<br>± .02 | 45.59<br>± .18 | 68.11<br>± .11 | 64.14<br>± .01 |

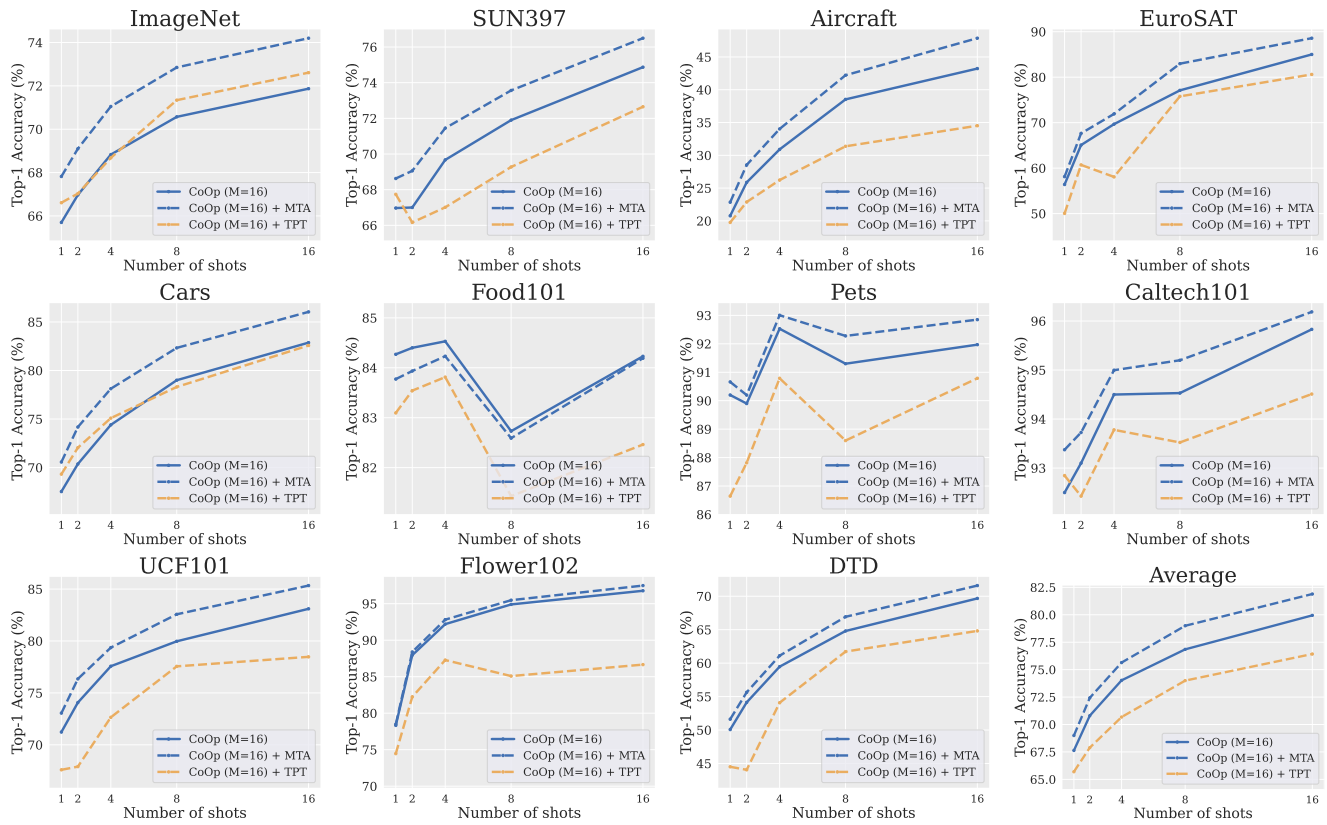

Figure 5. Additional results for Figure 3 with M=16 tokens for the CoOp pretrained prompts.

Table 12. The 80 handcrafted prompts used for majority vote.

"a photo of a []", "a bad photo of a []", "a photo of many []", "a sculpture of a []",  
"a photo of the hard to see []", "a low resolution photo of the []", "a rendering of a []",  
"graffiti of a []", "a bad photo of the []", "a cropped photo of the []", "a tattoo of a []",  
"the embroidered []", "a photo of a hard to see []", "a bright photo of a []",  
"a photo of a clean []", "a photo of a dirty []", "a dark photo of the []",  
"a drawing of a []", "a photo of my []", "the plastic []", "a photo of the cool []",  
"a close-up photo of a []", "a black and white photo of the []", "a painting of the []",  
"a painting of a []", "a pixelated photo of the []", "a sculpture of the []",  
"a bright photo of the []", "a cropped photo of a []", "a plastic []",  
"a photo of the dirty []", "a jpeg corrupted photo of a []", "a blurry photo of the []",  
"a photo of the []", "a good photo of the []", "a rendering of the []",  
"a [] in a video game.", "a photo of one []", "a doodle of a []",  
"a close-up photo of the []", "the origami []", "the [] in a video game.",  
"a sketch of a []", "a doodle of the []", "a origami []", "a low resolution photo of a []",  
"the toy []", "a rendition of the []", "a photo of the clean []", "a photo of a large []",  
"a rendition of a []", "a photo of a nice []", "a photo of a weird []",  
"a blurry photo of a []", "a cartoon []", "art of a []", "a sketch of the []",  
"a embroidered []", "a pixelated photo of a []", "itap of the []",  
"a jpeg corrupted photo of the []", "a good photo of a []", "a plushie []",  
"a photo of the nice []", "a photo of the small []", "a photo of the weird []",  
"the cartoon []", "art of the []", "a drawing of the []", "a photo of the large []",  
"a black and white photo of a []", "the plushie []", "a dark photo of a []", "itap of a []",  
"graffiti of the []", "a toy []", "itap of my []", "a photo of a cool []",  
"a photo of a small []", "a tattoo of the []"
